# Supplementary material for: Unsupervised pattern identification in spatial gene expression atlas reveals mouse brain regions beyond established ontology
Source: PubMed Central journal article supplement (PMC11406299; doi:10.1073/pnas.2319804121), 2024-09-03
Supplement: pnas.2319804121.sapp.pdf [file pnas.2319804121.sapp.pdf]

## Supporting Information for

### Unsupervised pattern discovery in spatial gene expression atlas reveals mouse brain regions beyond established ontology

Robert Cahill<sup>1,2,#</sup>, Yu Wang<sup>3,#</sup>, R. Patrick Xian<sup>1,2</sup>, Alex J. Lee<sup>1,2</sup>, Hongkui Zeng<sup>4</sup>, Bin Yu<sup>3</sup>, Bosiljka Tasic<sup>4</sup>, Reza Abbasi-Asl<sup>1,2,\*</sup>

<sup>1</sup>University of California, San Francisco

<sup>2</sup>Weill Institute for Neurosciences

<sup>3</sup>University of California, Berkeley

<sup>4</sup>Allen Institute for Brain Science

#indicates equal contribution

\*Corresponding author: Reza Abbasi-Asl ([Reza.AbbasiAsl@ucsf.edu](mailto:Reza.AbbasiAsl@ucsf.edu))

#### This PDF file includes:

Supporting Information  
Figures S1 to S6  
Table S1

## SI-1. Moran's I

To quantify the spatial coherence of PPs, we used Moran's I statistic (1). It was originally used in geostatistics and has more recently been used in spatial gene expression literature (2). Moran's I ranges in value from -1 to 1. A value close to -1 indicates little spatial organization, similar to a chess board with black and white squares distributed across the board. A value close to 1 indicates a clear spatially distinct pattern, such as if all the black squares in a chess board were on one side and all white squares on the other. We calculated Moran's I as follows (2):

$$I = \frac{N \sum_{i=1}^N \sum_{j=1}^N w_{ij} (x_i - \bar{x})(x_j - \bar{x})}{W \sum_{i=1}^N (x_i - \bar{x})^2}.$$

Here,  $x_i$  and  $x_j$  represent the PP coefficient at voxel locations  $i$  and  $j$ , respectively.  $\bar{x}$  is the mean gene expression level of each PP.  $N$  is the total number of voxel locations,  $w_{ij}$  is the spatial adjacency relationship (based on the adjacency matrix,  $w$ ) between voxels  $i$  and  $j$ .  $W$  is the sum of all entries in  $w$ , which represents the cumulative total adjacencies. We mask the dataset to only include the brain region. Then, for each voxel, we select up to 6 voxels for determining adjacency (up, down, left, right, forward, background, where available), following the "rook" definition of neighborhood. We assign  $w_{ij}=1$  if voxel  $j$  is adjacent to  $i$ , and  $w_{ij}=0$  otherwise. Given the large size of the adjacency matrix (159,326 x 159,326), we downsampled the PPs by removing every other row in each of the three dimensions to improve computational efficiency. Given certain voxels had multiple PPs with small but non-zero coefficients, we assigned each voxel in the brain map to the PP with the highest coefficient for that voxel. This ensures that unique voxels are not represented by multiple PPs.

## SI-2. 3D visualizations of PPs

The 3D gene visualizations were performed using Napari viewer, a multi-dimensional image viewer for Python (3). Key settings in Napari for PPs included: opacity=1, gamma=1, blending='additive', depiction='volume', and rendering='attenuated MIP'. MIP stands for maximum intensity projection, which enhances the 3D representation of objects. We moved the slide bar to 20% from the left side for 'attenuated MIP.'

### SI-3. Algorithm 1: Spatial neighborhood query (pairwise in 3D)

---

**Algorithm 1** Spatial neighborhood query (pairwise in 3D)

---

```
1: function PairwiseNeighbors (atlas)
2:   # Calculate the number of brain regions
3:   n = Unique (atlas)
4:   adjacency_list = []
5:   all pairs = Combinations (Range (1,n))
6:   # Check the overlap between each pair
7:   for (i, j) in all pairs do
8:     # Mask normalization (by the index i or j), then dilate the brain regions
9:     DB_i = BinaryDilate (B_i L i)
10:    DB_j = BinaryDilate (B_j L j)
11:    # Test of spatial contiguity
12:    if Sum (DB_i == DB_j) > 0 then
13:      # The i-th and j-th regions are neighbors (their dilated versions
14:      # have non-vanishing overlap)
15:      Append (adjacency_list, (i, j))
16:   return adjacency_list
```

---

#### SI-4. Supporting Figures

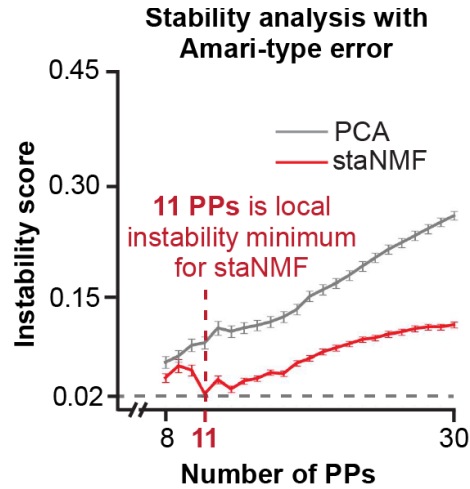

**Figure S1: Stability analysis with Amari-type error function.** Instability score of staNMF PPs and PCA PPs across 100 runs for each  $K$  value, from 8 to 30 for ABA dataset. The error bars are the standard deviation. This figure uses Amari-type error (4), while Fig. 1B uses the Hungarian matching method (5). Both approaches identify  $K = 11$  for the minimum instability score (and thus most stability) for staNMF PPs.

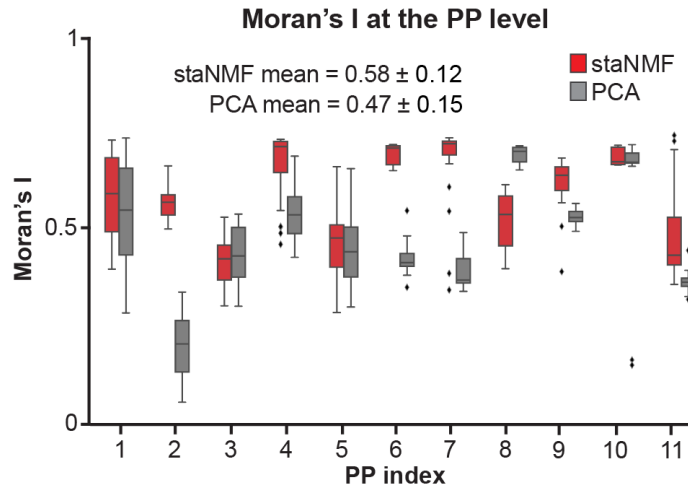

**Figure S2: Moran's I per PP from staNMF and PCA.** The plot uses data from 20 bootstrap simulations for each PP, for a total of 220 simulations for staNMF PPs and 220 simulations for PCA PPs. The mean Moran's I was  $0.58 \pm 0.12$  for staNMF and  $0.47 \pm 0.15$  for PCA. The p-value between the two samples was  $<0.001$ . The PPs from staNMF show greater spatial coherence, or higher Moran's I (1), than those from PCA for all but one case (PP8).

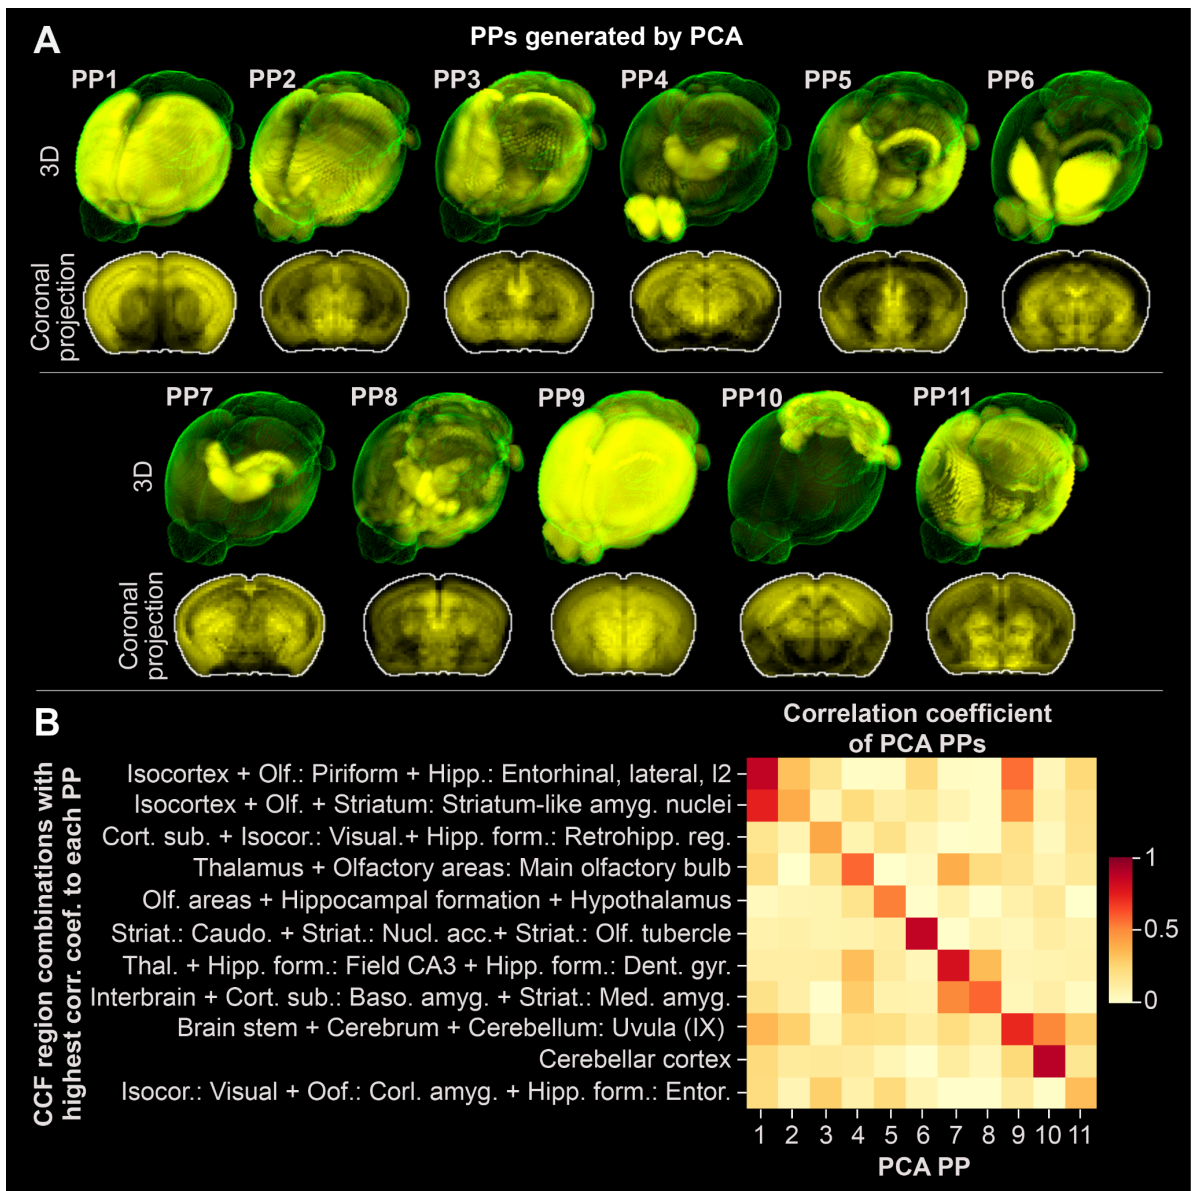

**Figure S3: Similarity of PCA PPs to the expert-annotated brain regions. A.** 11 PPs generated by PCA, ordered based on highest coarse region correlation to the CCFv3 ontology (6) in 3D and projected on the coronal plane. **B.** Heat map of the correlation coefficient between PCA PPs and the most similar combination of CCF regions (with the highest correlation coefficient).

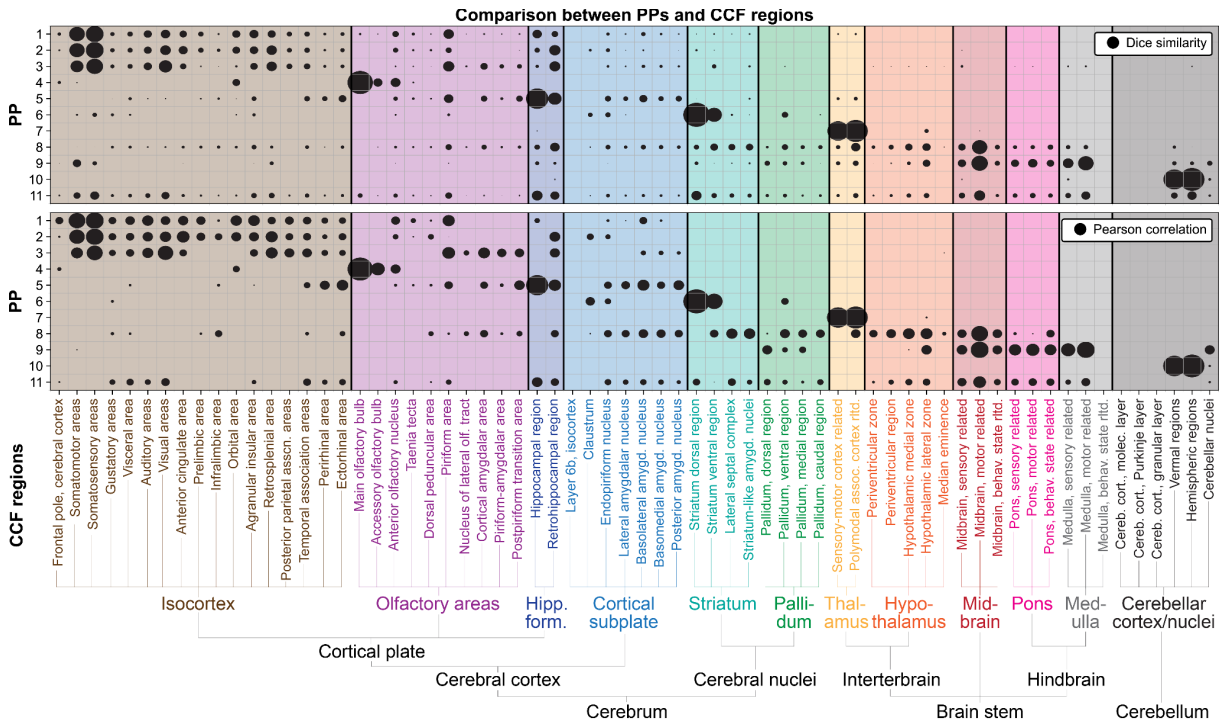

**Figure S4: Metrics for region-level comparison between staNMF PPs and the CCF.** The PPs from staNMF and CCF regions (6) are compared using the Dice similarity (top) and the Pearson correlation (bottom) visualized as the size of the filled circle. The PPs and CCF regions are arranged the same way as in Fig. 2 and Fig. S5.

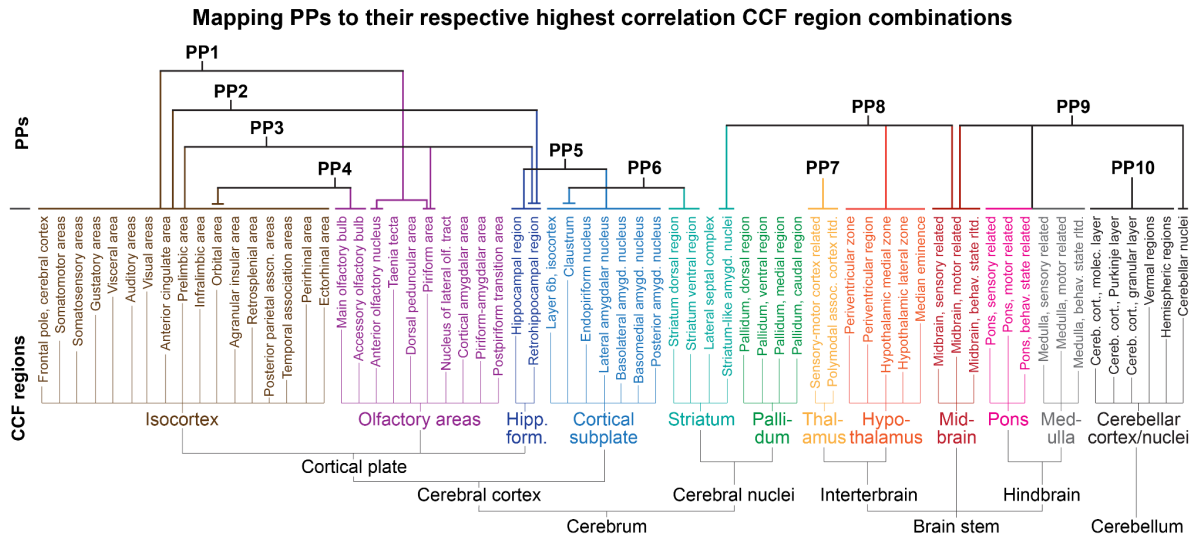

**Figure S5: Summary of staNMF PPs linked to the best-fit combination of Allen CCF regions.** The 10 PPs from main text Fig. 3 mapped to their best-fit combinations of CCF regions (6).

**PP8: Hypothalamus + Midbrain + Striatum:  
Striatum-like amygdalar nuclei**

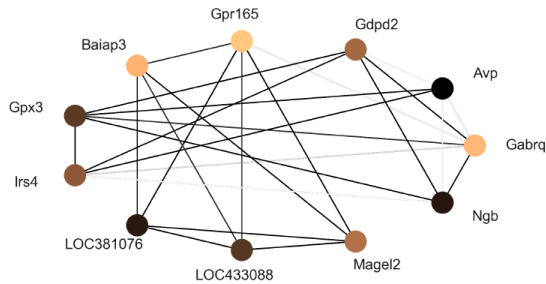

**PP10: Cerebellar cortex**

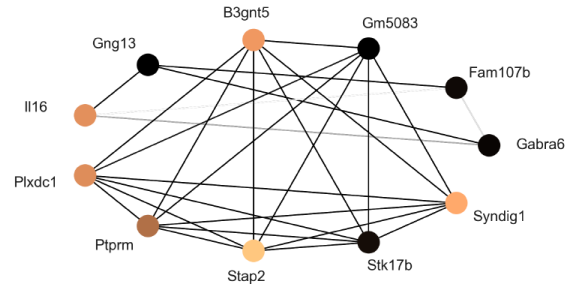

**PP9: Hindbrain + Midbrain + Cerebellar nuclei**

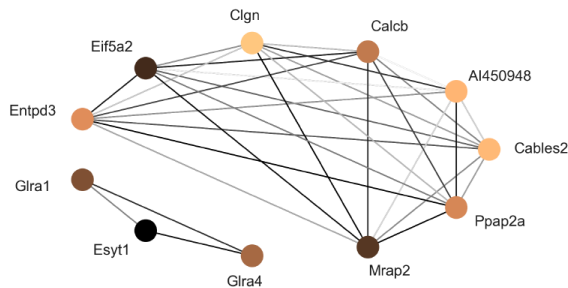

**PP11: Brain stem + Cerebrum + Cerebellar cortex:  
Flocculus**

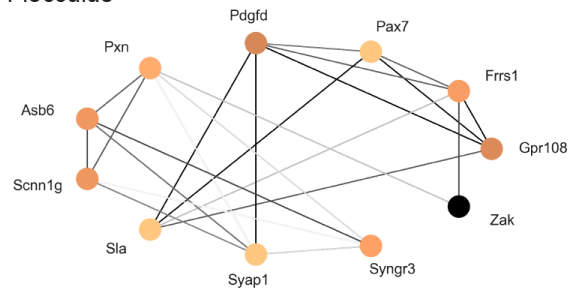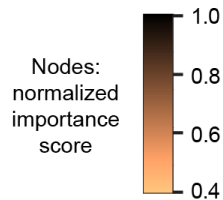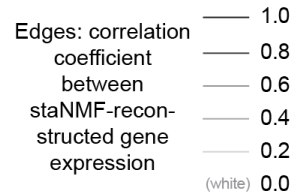

**Figure S6: Putative spatial gene co-expression network construction, continued.** Extension of Fig. 6 of the main text, the sGCNs from PPs 8-11 and their associated brain regions from the CCFv3 (6) are shown. The node color presents the selectivity of the gene to the PP associated with the brain region. An edge is drawn between genes if the similarity score is among the top 5% of all similarity scores for that gene subset. The edge color is proportional to the Pearson correlation of the reconstructed gene expression images of the two co-expressed genes.

**Table S1: Region-specific marker genes from ISH and scRNA-seq data.** Comparison of the PP-level (from ISH data) (7) and cell type-specific (from scRNA-seq data) (8) marker genes in the same spatial region of the adult mouse brain. The cell types subclass labels are from the Common Cell Type Nomenclature (CCN) (9).

| PP index | Subclass of cell type in CCN  | Marker gene |
|----------|-------------------------------|-------------|
| 1        | 005 L5 IT CTX Glut            | Arhgap25    |
| 1        | 034 NP PPP Glut               | Rxfp1       |
| 1        | 274 PDTg Otp Shroom3 Gaba     | Rxfp1       |
| 2        | 103 PVHd-DMH Lhx6 Gaba        | Gira1       |
| 2        | 156 MB-ant-ve Dmrta2 Glut     | Gira1       |
| 2        | 243 PGRN-PARN-MDRN Hoxb5 Glut | Sncg        |
| 2        | 261 HB Calcb Chol             | Calcb       |
| 3        | 062 STR D2 Gaba               | Adora2a     |
| 3        | 292 MV Nkx6-1 Gly-Gaba        | Serpina9    |
| 4        | 072 LSX Sall3 Lmo1 Gaba       | Ptprm       |
| 4        | 313 CBX Purkinje Gaba         | Pcp2        |
| 4        | 314 CB Granule Glut           | Gabra6      |
| 5        | 077 CEA-BST Gal Avp Gaba      | Avp         |
| 5        | 107 DMH Hmx2 Gaba             | Dlk1        |
| 5        | 108 ARH-PVp Tbx3 Gaba         | Dlk1        |
| 5        | 222 PB Evx2 Glut              | Gabrq       |
| 5        | 226 PRNc-PARN Tlx1 Glut       | Dlk1        |
| 5        | 296 RPA Pax6 Hoxb5 Gly-Gaba   | Dlk1        |
| 6        | 007 L2/3 IT CTX Glut          | Stard8      |
| 6        | 009 L2/3 IT PIR-ENTI Glut     | Igfn1       |
| 6        | 122 LHA-MEA Otp Glut          | Lhx2        |
| 6        | 219 PB-SUT Tlx3 Lhx2 Glut     | Lhx2        |
| 6        | 319 Astro-TE NN               | Lhx2        |
| 8        | 016 CA1-ProS Glut             | Spink8      |
| 8        | 037 DG Glut                   | Prox1       |
| 8        | 097 PVHd-SBPV Six3 Prox1 Gaba | Prox1       |
| 8        | 102 DMH-LHA Gsx1 Gaba         | Prox1       |
| 8        | 147 AD Serpinb7 Glut          | C1ql2       |
| 8        | 163 APN C1ql2 Glut            | C1ql2       |
| 9        | 011 L2 IT ENT-po Glut         | Lef1        |
| 9        | 107 DMH Hmx2 Gaba             | Lef1        |
| 9        | 125 DMH Hmx2 Glut             | Lef1        |
| 9        | 130 LHA Pmch Glut             | Pmch        |
| 9        | 152 RE-Xi Nox4 Glut           | Rgs16       |
| 9        | 187 SCsg Pde5a Glut           | Lef1        |
| 9        | 205 SC-PAG Lef1 Emx2 Gaba     | Lef1        |



|    |                               |       |
|----|-------------------------------|-------|
| 9  | 206 SCm-PAG Cdh23 Gaba        | Lef1  |
| 9  | 208 SC Lef1 Otx2 Gaba         | Lef1  |
| 10 | 035 OB Eomes Ms4a15 Glut      | Eomes |
| 10 | 045 OB-STR-CTX Inh IMN        | Dlx1  |
| 10 | 098 AHN-SBPV-PVHd Pdrm12 Gaba | Dlx1  |
| 10 | 105 TMd-DMH Foxd2 Gaba        | Dlx1  |
| 10 | 107 DMH Hmx2 Gaba             | Dlx1  |
| 10 | 260 MDRNv Crp Glut            | Sp8   |
| 10 | 289 MDRNd Prox1 Pax6 Gly-Gaba | Sp8   |
| 11 | 137 PH-an Pitx2 Glut          | Pax7  |
| 11 | 192 PPN-CUN-PCG Otp En1 Gaba  | Pax7  |
| 11 | 204 SC Otx2 Gcnt4 Gaba        | Pax7  |
| 11 | 205 SC-PAG Lef1 Emx2 Gaba     | Pax7  |
| 11 | 208 SC Lef1 Otx2 Gaba         | Pax7  |
| 11 | 209 SCs Pax7 Nfia Gaba        | Pax7  |
| 11 | 212 SCs Lef1 Gli3 Gaba        | Pax7  |
| 11 | 277 DTN-LDT-IPN Otp Pax3 Gaba | Pax7  |
| 11 | 280 NLL-po Pax7 Gaba          | Pax7  |

## References

1. Moran, P. A. P. Notes on Continuous Stochastic Phenomena. *Biometrika* 37, 17–23 (1950).
2. J. Hu, et al., SpaGCN: Integrating gene expression, spatial location and histology to identify spatial domains and spatially variable genes by graph convolutional network. *Nat. Methods* 18, 1342–1351 (2021).
3. Napari: Multi-dimensional image viewer for python. Information available at <https://napari.org/stable/>.
4. Amari, S., Cichocki, A. & Yang, H. A New Learning Algorithm for Blind Signal Separation. in *Advances in Neural Information Processing Systems* vol. 8 (MIT Press, 1995).
5. Kuhn, H. The Hungarian Method for the assignment problem. *Naval Res Logist Q2*, 83–97 (1955).
6. Wang, Q. et al. The Allen mouse brain common coordinate framework: a 3D reference atlas. *Cell* 181, 936–953 (2020).
7. Lein, E. S. et al. Genome-wide atlas of gene expression in the adult mouse brain. *Nature* 445, 168–176 (2007).
8. Z. Yao, et al., A high-resolution transcriptomic and spatial atlas of cell types in the whole mouse brain. *Nature* 624, 317–332 (2023).
9. J. A. Miller, et al., Common cell type nomenclature for the mammalian brain. *eLife* 9, e59928 (2020).
